# Supplementary material for: Extensive compensatory cis-trans regulation in the evolution of mouse gene expression
Source: HighWire-hosted journal article supplement (doi:10.1101/gr.142281.112), 2012-08-23
Supplement: SuppLegends.docx [file SuppLegends.docx]

**SUPPLEMENTAL FIGURES**

SF1 – Samples cluster by strain

SF2 – Quantifying our ability to estimate allele specific expression

SF3 – Validation of allele-specific measurements made using RNA-seq

SF4 – Detecting highly variable genes

SF5 – Classification using different fold change cutoffs

SF6 – Density of the standard errors of the gene allelic expression estimates obtained with MMSEQ in the F1s for each class

SF7 - Comparing cis and trans effects for genes with expression levels that diverge due to regulatory variants both in cis and in trans

SF8 - No relationship between conservation score and standard error estimates

SF9 - Distribution of likelihood ratios for the test of imprinting

SF10 - Promoter sequence conservation scores for the different classes of regulatory divergence

SF11 - The relative exonic conservation scores of the different classes are robust to changes in the threshold used to call a nucleotide as conserved.

**SUPPLEMENTAL TABLES**

ST1 - Table of genes differentially expressed between CAST/EiJ and C57BL/6J

ST2 - GO enrichments for genes up-regulated in C57BL/6J

ST3 - GO enrichments for genes up-regulated in CAST/EiJ

ST4 – Overlap of the top 10% highly variable genes in C57BL/6J and CAST/EiJ

ST5 - List of imprinted genes

ST6 – Regulatory classification of genes with divergent expression

ST7 – Standard error estimates from MMSEQ

ST8 - GO enrichments for genes regulated in cis

ST9 - GO enrichments for genes regulated in trans

ST10 – Significance of the pairwise t-tests between the conservation scores of the different categories

ST11 - Summary of total number of reads in each lane and the number mapped successfully

ST12 - Expression count estimates for each gene obtained with MMSEQ

ST13 – Pyrosequencing primers
